# Supplementary material for: Brain and molecular mechanisms underlying the nonlinear association between close friendships, mental health, and cognition in children
Source: eLife. 2023 Jul 3;12:e84072. doi: 10.7554/eLife.84072 (PMC10317501; doi:10.7554/eLife.84072)
Supplement: Figure 2—source data 1. [file elife-84072-fig2-data1.xlsx]

## Sheet: Sheet1
Source data for Figure 2a											Source data for Figure 2h
Variables	F value	P value	β_linear	t_linear	p_linear	β_quadratic	t_quadratic	p_quadratic			Variables	Breakpoint	β_⩽5	β_⩽5_lower95%CI	β_⩽5_upper95%CI	p_⩽5	N_⩽5	β_⩽5	β_>5_lower95%CI	β_>5_upper95%CI	p_>5	N_>5
cbcl-scr-syn-anxdep	3.59672	0.0274609	-0.0893895	-2.38916	0.0169118	0.0381712	1.95085	0.0511117			cbcl-scr-syn-social	5	-0.974932	-1.33117	-0.618695	8.46039e-08	4863	0.30009	-0.0714579	0.671638	0.113372	2649
cbcl-scr-syn-withdep	29.8794	1.1888e-13	-0.155075	-7.71289	1.38908e-14	0.0324045	3.08184	0.00206473			cbcl-scr-syn-thought	4	-0.742373	-1.08558	-0.39917	2.27079e-05	4863	0.376311	0.00484016	0.747782	0.0470908	2649
cbcl-scr-syn-somatic	1.93583	0.144377	0.041496	1.73307	0.0831238	0.00369438	0.295042	0.76797			cbcl-scr-syn-attention	4	-1.55568	-2.10485	-1.00651	2.94894e-08	4863	0.571334	-0.0133095	1.15598	0.0554445	2649
cbcl-scr-syn-social	21.733	3.87971e-10	-0.123787	-4.71844	2.41982e-06	0.0812563	5.9226	3.30918e-09			cbcl-scr-syn-aggressive	5	-1.29102	-2.09923	-0.482806	0.00175042	3949	0.648494	0.0317148	1.26527	0.039333	3563
cbcl-scr-syn-thought	13.2843	1.74153e-06	-0.0637792	-2.48941	0.0128169	0.0681653	5.08759	3.71461e-07			cbcl-scr-syn-external	5	-1.57265	-2.64247	-0.502821	0.00397256	3949	0.87019	0.0477361	1.69264	0.0381114	3563
cbcl-scr-syn-attention	18.231	1.26361e-08	-0.140335	-3.44207	0.000580432	0.124293	5.82953	5.78946e-09			cbcl-scr-syn-totprob	6	-8.06237	-11.4245	-4.70023	2.67248e-06	3949	1.84704	-0.683913	4.378	0.152566	3563
cbcl-scr-syn-rulebreak	4.65181	0.00957194	0.00326662	0.157394	0.874939	0.0305643	2.81602	0.00487504			cbcl-scr-dsm5-depress	6	-0.57522	-0.904068	-0.246373	0.000610364	4863	0.091171	-0.244561	0.426903	0.59443	2649
cbcl-scr-syn-aggressive	8.49701	0.000206054	-0.0559149	-1.11994	0.262775	0.107388	4.11295	3.94814e-05			cbcl-scr-dsm5-adhd	6	-1.05072	-1.51556	-0.585866	9.57461e-06	4863	0.494802	-0.0146252	1.00423	0.0569447	2649
cbcl-scr-syn-internal	5.36733	0.00468456	-0.202969	-3.05651	0.00224722	0.0742701	2.13866	0.0324958			cbcl-scr-dsm5-conduct	5	-0.406486	-0.82359	0.0106192	0.0561218	3949	0.372953	0.0522075	0.693699	0.0226809	3563
cbcl-scr-syn-external	8.07439	0.000314135	-0.0526483	-0.793742	0.427371	0.137952	3.97699	7.04499e-05			cbcl-scr-07-sct	5	-0.5103	-0.708334	-0.312267	4.56978e-07	3949	0.0785229	-0.0705788	0.227625	0.301885	3563
cbcl-scr-syn-totprob	13.0486	2.20251e-06	-0.570888	-2.76532	0.00570057	0.537106	4.97492	6.67302e-07			cbcl-scr-07-stress	5	-1.19346	-1.72619	-0.660732	1.14734e-05	4863	0.129468	-0.441355	0.700291	0.656542	2649
cbcl-scr-dsm5-depress	10.4401	2.96642e-05	-0.0893342	-3.71262	0.000206617	0.0472742	3.7568	0.000173409			nihtbx-picvocab	5	1.62364	0.496408	2.75087	0.00476529	4863	-3.35412	-4.53635	-2.17188	2.91747e-08	2649
cbcl-scr-dsm5-anxdisord	4.41532	0.0121222	-0.0715441	-2.40704	0.0161067	0.0380869	2.45028	0.0142974			nihtbx-list	5	4.07719	2.46897	5.68541	6.89833e-07	5494	-2.99448	-5.23504	-0.75392	0.00883245	2018
cbcl-scr-dsm5-somaticpr	2.52638	0.0800161	0.0418732	2.2462	0.0247205	-0.00657202	-0.674126	0.500252			nihtbx-picture	5	4.14586	2.46504	5.82668	1.36489e-06	5494	-1.46763	-3.9142	0.978938	0.239557	2018
cbcl-scr-dsm5-adhd	12.7586	2.94053e-06	-0.0590273	-1.69333	0.0904336	0.0920866	5.05146	4.48822e-07			nihtbx-reading	4	2.30371	1.40289	3.20453	5.51571e-07	5494	-2.06813	-3.29137	-0.844893	0.000930486	2018
cbcl-scr-dsm5-opposit	4.16203	0.015612	-0.0140948	-0.584648	0.558802	0.0360253	2.85743	0.00428265			nihtbx-fluidcomp	4	4.59726	3.07074	6.12378	3.78837e-09	4863	-2.29482	-3.97631	-0.613324	0.00749493	2649
cbcl-scr-dsm5-conduct	6.96558	0.000949954	-0.0115508	-0.446552	0.655211	0.0492411	3.64015	0.000274315			nihtbx-cryst	4	2.38102	1.42007	3.34196	1.22577e-06	4863	-2.75427	-3.76498	-1.74356	9.90043e-08	2649
cbcl-scr-07-sct	13.8637	9.77673e-07	-0.0515495	-4.23135	2.35071e-05	0.0278673	4.37402	1.23634e-05			nihtbx-totalcomp	5	4.08292	2.87131	5.29453	4.36265e-11	4863	-3.10501	-4.42244	-1.78759	3.99378e-06	2649
cbcl-scr-07-ocd	6.33143	0.00178904	-0.0587414	-2.67071	0.00758557	0.0358006	3.11245	0.00186238
cbcl-scr-07-stress	11.596	9.36933e-06	-0.131905	-3.32957	0.000874025	0.0910757	4.39603	1.11774e-05
nihtbx-picvocab	24.3989	2.74243e-11	-0.198607	-2.38483	0.0171117	-0.234411	-5.38235	7.57521e-08
nihtbx-flanker	4.71418	0.00899388	0.155846	1.49761	0.134277	-0.164786	-3.02799	0.00247026
nihtbx-list	14.2268	6.80961e-07	0.450944	3.34008	0.000841651	-0.355825	-5.03967	4.77281e-07
nihtbx-cardsort	6.00961	0.00246692	0.0173666	0.162007	0.871305	-0.185897	-3.31608	0.000917253
nihtbx-pattern	4.63628	0.00972161	0.433278	2.53471	0.0112741	-0.218235	-2.44128	0.0146583
nihtbx-picture	12.8119	2.78861e-06	0.630548	4.41605	1.01933e-05	-0.284841	-3.8146	0.000137501
nihtbx-reading	19.2397	4.63144e-09	0.249041	3.31172	0.000931626	-0.238048	-6.05312	1.48926e-09
nihtbx-fluidcomp	18.5325	9.36085e-09	0.472732	4.12019	3.82637e-05	-0.336379	-5.60613	2.14267e-08
nihtbx-cryst	25.413	1.00143e-11	0.0378107	0.531876	0.594828	-0.255575	-6.87455	6.71943e-12
nihtbx-totalcomp	28.0444	7.34373e-13	0.291079	3.20926	0.00133641	-0.353456	-7.45177	1.02416e-13
Source data for Figure 2b						Source data for Figure 2c
Number of close friends (median in each bin)	Mean of DV	SD of DV	N in each bin			Number of close friends (median in each bin)	Mean of DV	SD of DV	N in each bin
0	28.4019	23.7379	107			0	5.05607	4.68202	107
1	19.559	18.3411	585			1	3.32479	3.64717	585
2	18.3297	17.4624	1104			2	3.01359	3.54978	1104
3	16.8704	15.8429	1196			3	2.65134	3.18543	1196
4	17.2811	16.8326	957			4	2.78056	3.29668	957
5	17.3304	16.4089	914			5	2.68381	3.22056	914
6	18.0571	17.1085	631			6	2.86846	3.38439	631
7	16.9373	17.5666	399			7	2.60401	2.98044	399
8	17.1836	15.2602	463			8	2.77538	3.26819	463
10	16.4904	17.0332	363			10	2.77961	3.41526	363
13	18.3846	18.9241	416			13	3.08894	3.44237	416
24	19.1485	19.5063	377			24	3.09284	3.60693	377
Source data for Figure 2d						Source data for Figure 2e
Number of close friends (median in each bin)	Mean of DV	SD of DV	N in each bin			Number of close friends (median in each bin)	Mean of DV	SD of DV	N in each bin
0	2.2243	2.92777	107			0	2.8785	2.89668	107
1	1.15385	1.8057	585			1	1.84786	2.41196	585
2	1.2038	1.85639	1104			2	1.7029	2.33747	1104
3	0.974916	1.64081	1196			3	1.47157	2.05083	1196
4	1.00418	1.6184	957			4	1.40648	2.01014	957
5	1.01641	1.55961	914			5	1.45405	2.11254	914
6	0.973059	1.54125	631			6	1.48811	1.97992	631
7	0.837093	1.60434	399			7	1.3985	2.08828	399
8	0.786177	1.30751	463			8	1.41901	2.00039	463
10	0.732782	1.25821	363			10	1.35813	2.08218	363
13	0.865385	1.6837	416			13	1.49279	2.29509	416
24	0.859416	1.54846	377			24	1.70557	2.48523	377
Source data for Figure 2f						Source data for Figure 2g
Number of close friends (median in each bin)	Mean of DV	SD of DV	N in each bin			Number of close friends (median in each bin)	Mean of DV	SD of DV	N in each bin
0	87.757	10.4798	107			0	84.2336	6.65253	107
1	90.4393	10.081	585			1	85.759	6.70476	585
2	90.7563	10.2779	1104			2	86.4284	6.99296	1104
3	93.0343	10.0531	1196			3	87.3763	6.79962	1196
4	92.9685	9.96632	957			4	87.9958	6.85429	957
5	93.6589	9.88488	914			5	88.1627	7.07566	914
6	93.5008	10.3119	631			6	87.8384	6.83333	631
7	93.802	10.2877	399			7	88.005	6.99605	399
8	92.8834	10.7602	463			8	87.3175	6.59666	463
10	92.2645	10.8822	363			10	86.9697	6.83682	363
13	91.8942	10.649	416			13	86.5962	6.939	416
24	90.8647	10.7938	377			24	85.0106	6.56148	377
