# Supplementary material for: Brain and molecular mechanisms underlying the nonlinear association between close friendships, mental health, and cognition in children
Source: eLife. 2023 Jul 3;12:e84072. doi: 10.7554/eLife.84072 (PMC10317501; doi:10.7554/eLife.84072)
Supplement: Figure 3—source data 1. [file elife-84072-fig3-data1.xlsx]

## Sheet: Sheet1
Source data for Figure 3a-c												Source data for Figure 3d					Source data for Figure 3e
Regions	F value	P value	β_linear	t_linear	p_linear	β_quadratic	t_quadratic	p_quadratic	ΔR2_linear	ΔR2_quadratic		Number of close friends (median in each bin)	Mean of DV	SD of DV	N in each bin		Number of close friends (median in each bin)	Mean of DV	SD of DV	N in each bin
R_V1_ROI	2.98568	0.0505655	-4.84507	-0.794078	0.427175	-6.09203	-1.90973	0.0562067	0.000166548	0.000333036		0	184991	19351.3	107		0	180.639	26.1036	107
R_MST_ROI	1.26704	0.281725	0.310667	0.381907	0.702541	-0.673605	-1.58385	0.11327	-0.000114642	0.000177459		1	185317	18083.7	585		1	180.353	22.763	585
R_V6_ROI	1.37904	0.251883	0.355319	0.405792	0.684907	-0.756786	-1.65312	0.098349	-0.000115664	0.000205601		2	186193	18937.9	1104		2	181.074	24.8465	1104
R_V2_ROI	2.38533	0.0921291	-0.941384	-0.255426	0.798401	-3.77126	-1.95718	0.0503632	-7.03558e-06	0.000330354		3	187324	17278.4	1196		3	183.569	23.3514	1196
R_V3_ROI	1.98943	0.136846	0.0121749	0.00515123	0.99589	-2.3236	-1.88041	0.0600909	-5.99142e-05	0.000272609		4	188140	18514.6	957		4	183.659	24.3713	957
R_V4_ROI	2.93469	0.0532086	-0.713725	-0.359738	0.719053	-2.2152	-2.13557	0.0327468	3.23177e-05	0.000373377		5	187422	18044.9	914		5	184.077	23.8516	914
R_V8_ROI	3.92857	0.0197125	-0.0627008	-0.115401	0.908131	-0.738284	-2.599	0.00936802	1.13896e-05	0.000645357		6	187375	17995.4	631		6	183.207	24.3869	631
R_4_ROI	2.37489	0.0930953	3.22872	1.42959	0.152877	-2.39674	-2.02977	0.0424149	-4.02007e-05	0.000338458		7	186549	16743.8	399		7	182.061	23.2726	399
R_3b_ROI	2.46283	0.085263	2.47903	1.62687	0.103807	-1.56831	-1.96856	0.0490403	5.34202e-06	0.00030705		8	186369	18964.1	463		8	183.62	25.2507	463
R_FEF_ROI	0.17739	0.837457	0.162174	0.132102	0.894907	-0.379591	-0.591415	0.554261	-0.000123058	-8.04367e-05		10	186691	17801.9	363		10	182.333	25.6151	363
R_PEF_ROI	1.89084	0.151017	1.00918	1.40708	0.159444	-0.65138	-1.73712	0.0824067	-2.92879e-05	0.000250229		13	185371	17791.1	416		13	181.851	22.475	416
R_55b_ROI	0.790368	0.453716	0.414763	0.61413	0.539148	-0.43772	-1.23966	0.21514	-0.000116438	6.53782e-05		24	184331	16929.4	377		24	178.502	21.101	377
R_V3A_ROI	0.998509	0.368478	-0.257462	-0.223421	0.823214	-0.746557	-1.23914	0.215334	-6.17674e-05	6.14253e-05
R_RSC_ROI	2.21304	0.109439	1.09986	1.48286	0.138154	-0.738318	-1.90393	0.056957	-2.30938e-05	0.000304315
R_POS2_ROI	3.83109	0.0217285	3.54797	2.33305	0.0196718	-1.7389	-2.18709	0.0287672	0.000216078	0.000435282		Source data for Figure 3f					Source data for Figure 3g
R_V7_ROI	2.36221	0.094282	-0.217047	-0.561016	0.574803	-0.361909	-1.78924	0.0736167	6.47658e-05	0.000272775		Number of close friends (median in each bin)	Mean of DV	SD of DV	N in each bin		Number of close friends (median in each bin)	Mean of DV	SD of DV	N in each bin
R_IPS1_ROI	3.3287	0.0358927	-0.299704	-0.359726	0.719062	-0.995528	-2.28549	0.022312	5.46601e-05	0.00053276		0	1238.8	143.09	107		0	509.219	66.0214	107
R_FFC_ROI	7.79519	0.000415068	-0.236784	-0.178193	0.858576	-2.53932	-3.65513	0.000258817	0.000134077	0.00134885		1	1223.46	136.296	585		1	512.988	67.5811	585
R_V3B_ROI	2.47007	0.0846481	-0.379041	-0.592527	0.553516	-0.60819	-1.81847	0.0690319	7.7646e-05	0.000283009		2	1234.86	137.051	1104		2	519.713	66.6834	1104
R_LO1_ROI	3.3127	0.0364713	-0.0931888	-0.214191	0.830404	-0.533152	-2.34388	0.0191106	1.50122e-05	0.000514901		3	1245.45	132.44	1196		3	523.132	64.9836	1196
R_LO2_ROI	4.46767	0.0115046	-0.110435	-0.388713	0.697499	-0.395224	-2.6608	0.00781225	9.41912e-05	0.000670115		4	1245.64	138.392	957		4	525.251	71.0716	957
R_PIT_ROI	5.99075	0.00251382	-0.485374	-0.83557	0.403423	-0.875534	-2.88287	0.00395191	0.000292726	0.000801775		5	1250.6	139.12	914		5	524.601	69.2298	914
R_MT_ROI	1.88365	0.152106	0.0802041	0.170631	0.864518	-0.461597	-1.87833	0.0603753	-8.96938e-05	0.000297954		6	1242.64	143.943	631		6	526.188	68.4575	631
R_A1_ROI	1.85302	0.156836	0.334743	1.78409	0.0744495	-0.125635	-1.28075	0.200323	0.000130988	7.87171e-05		7	1241.86	134.967	399		7	522.603	65.5952	399
R_PSL_ROI	2.18824	0.112185	2.09371	1.95079	0.0511194	-0.767198	-1.36725	0.171589	0.000173453	0.000100075		8	1249.85	146.141	463		8	522.397	69.4889	463
R_SFL_ROI	3.17608	0.0418052	1.88442	2.17487	0.029671	-0.874497	-1.93046	0.0535881	0.00019568	0.000328357		10	1239.38	132.756	363		10	525.727	71.0466	363
R_PCV_ROI	0.749461	0.472657	1.43492	1.2237	0.221104	-0.229895	-0.374992	0.707677	4.35097e-05	-0.000104337		13	1231.01	138.249	416		13	527.278	67.9332	416
R_STV_ROI	0.654026	0.519978	1.10349	1.01208	0.311534	-0.479883	-0.841833	0.399908	-4.80088e-05	-3.49174e-05		24	1217.42	130.705	377		24	520.99	66.8387	377
R_7Pm_ROI	1.3472	0.26003	0.87836	1.59915	0.10983	-0.0541801	-0.18867	0.850357	0.000201332	-0.000117058
R_7m_ROI	2.7759	0.0623579	1.57559	1.95206	0.0509681	-0.801299	-1.89885	0.0576227	0.000108169	0.000298034
R_POS1_ROI	4.68733	0.00923837	1.38364	1.32303	0.185867	-1.66505	-3.04524	0.00233307	-0.000103362	0.000950395		Source data for Figure 3h					Source data for Figure 3i
R_23d_ROI	3.20747	0.0405146	1.16834	2.17953	0.0293233	-0.545842	-1.94763	0.0514968	0.000194732	0.000335538		Number of close friends (median in each bin)	Mean of DV	SD of DV	N in each bin		Number of close friends (median in each bin)	Mean of DV	SD of DV	N in each bin
R_v23ab_ROI	1.26582	0.282067	0.411935	0.945469	0.34445	-0.346936	-1.52305	0.127788	-9.279e-05	0.000155376		0	175.704	22.7181	107		0	359.632	52.8561	107
R_d23ab_ROI	1.47221	0.229485	0.363344	1.50576	0.132171	-0.161614	-1.28105	0.200218	3.61579e-05	7.64491e-05		1	175.334	25.0053	585		1	364.505	52.7791	585
R_31pv_ROI	0.871726	0.418272	0.677765	1.01397	0.310629	-0.397463	-1.13734	0.255433	-6.64351e-05	3.54534e-05		2	177.364	24.317	1104		2	369.391	56.9254	1104
R_5m_ROI	0.594489	0.551871	0.550776	1.08137	0.279567	-0.131901	-0.49533	0.620381	-6.84374e-06	-9.17884e-05		3	178.765	23.6605	1196		3	373.726	54.863	1196
R_5mv_ROI	1.57805	0.206445	1.37678	1.69139	0.0908045	-0.459728	-1.08025	0.280064	0.000118189	1.9951e-05		4	180.007	25.1128	957		4	373.992	55.6956	957
R_23c_ROI	2.15654	0.115797	1.61012	1.82195	0.0685032	-0.716677	-1.55112	0.120915	0.000106582	0.000165255		5	180.042	24.8941	914		5	371.994	54.599	914
R_5L_ROI	1.67269	0.187812	1.13255	1.76537	0.077543	-0.35012	-1.04386	0.296584	0.000146527	1.04617e-05		6	179.148	25.0985	631		6	371.734	54.0591	631
R_24dd_ROI	4.16378	0.0155848	1.09497	1.12659	0.259954	-1.4639	-2.88085	0.00397739	-0.000118686	0.000890761		7	179.592	23.6232	399		7	371.313	55.7067	399
R_24dv_ROI	2.48852	0.0831015	1.17202	1.64736	0.099526	-0.73297	-1.97054	0.0488132	1.14726e-05	0.000353339		8	178.877	25.4353	463		8	372.945	55.5779	463
R_7AL_ROI	0.573768	0.563424	0.794488	0.769003	0.441916	-0.518992	-0.960833	0.336667	-9.27377e-05	-9.18346e-06		10	179.742	25.6949	363		10	371.866	54.8411	363
R_SCEF_ROI	5.62665	0.0036159	2.25343	2.43311	0.0149931	-1.44914	-2.99277	0.0027736	0.000150429	0.000923988		13	179.658	26.0028	416		13	370.864	58.0744	416
R_6ma_ROI	4.59549	0.0101258	4.24259	2.78186	0.00541846	-1.65045	-2.06992	0.0384945	0.000478866	0.000402732		24	176.184	24.556	377		24	365.755	52.2176	377
R_7Am_ROI	0.78429	0.456481	1.17839	0.996538	0.319021	0.234665	0.379575	0.704271	5.08221e-05	-0.000102458
R_7PL_ROI	2.48698	0.0832296	1.03233	2.21622	0.0267064	-0.124126	-0.509689	0.610284	0.000454028	-9.04952e-05
R_7PC_ROI	1.24369	0.288377	1.91721	1.49698	0.13444	-0.0238088	-0.0355574	0.971636	0.000183156	-0.000123094
R_LIPv_ROI	3.47343	0.0310606	1.20259	1.28719	0.198068	0.846809	1.73363	0.0830252	0.000370179	0.000252449
R_VIP_ROI	2.51798	0.0806904	0.99143	1.53615	0.124543	0.345694	1.0245	0.305634	0.000364463	6.05326e-06
R_MIP_ROI	0.186373	0.829968	0.662951	0.600582	0.548137	-0.0568235	-0.0984612	0.921569	-7.8477e-05	-0.000122055
R_1_ROI	2.23545	0.107015	1.60595	1.07452	0.282623	-1.62239	-2.07627	0.037903	-9.25421e-05	0.000364618
R_2_ROI	0.998407	0.368515	0.904373	0.318807	0.749882	-2.08188	-1.40372	0.160442	-0.000114499	0.000114125
R_3a_ROI	0.890719	0.410404	0.95307	1.26984	0.204182	-0.319372	-0.81389	0.415734	1.30259e-05	-3.69368e-05
R_6d_ROI	1.16509	0.311951	1.33316	1.45249	0.146408	-0.446457	-0.930368	0.352211	5.49211e-05	-1.58911e-05
R_6mp_ROI	4.39948	0.0123155	3.97275	2.40892	0.0160237	-2.10368	-2.43981	0.0147179	0.000228877	0.000614271
R_6v_ROI	1.44384	0.236085	0.857667	1.09266	0.274578	-0.653723	-1.59297	0.11121	-7.82614e-05	0.000185129
R_p24pr_ROI	3.24589	0.0389886	0.867792	1.62475	0.104257	-0.668654	-2.39452	0.0166664	-3.02033e-05	0.000589437
R_33pr_ROI	2.45771	0.0857001	0.588717	1.28602	0.198477	-0.510543	-2.13314	0.0329459	-7.99796e-05	0.000446991
R_a24pr_ROI	1.90085	0.149514	0.224551	0.746698	0.45527	-0.30617	-1.94733	0.0515325	-0.000124759	0.000351627
R_p32pr_ROI	2.68826	0.0680649	0.960087	1.5828	0.113508	-0.674807	-2.12786	0.0333814	-1.78383e-05	0.000414794
R_a24_ROI	6.51075	0.00149581	0.82229	1.90249	0.0571458	-0.797076	-3.5273	0.000422334	-4.7229e-05	0.001281
R_d32_ROI	3.08638	0.0457254	1.58321	2.082	0.0373761	-0.785826	-1.97659	0.0481251	0.000144127	0.000331116
R_8BM_ROI	5.06766	0.0063188	3.37943	2.9176	0.00353786	-1.32039	-2.18037	0.0292609	0.000503165	0.000431235
R_p32_ROI	3.32489	0.0360296	1.19835	2.07106	0.0383875	-0.648303	-2.14306	0.0321405	0.000113306	0.000385321
R_10r_ROI	2.95586	0.0520949	0.893512	2.09457	0.0362427	-0.416352	-1.86682	0.0619662	0.00015355	0.000267548
R_47m_ROI	5.44759	0.00432377	1.01689	2.80206	0.00509075	-0.490435	-2.58483	0.00976153	0.000346951	0.000613555
R_8Av_ROI	0.661113	0.516307	1.85115	0.992362	0.321053	-0.85884	-0.880619	0.378553	-5.40883e-05	-2.67964e-05
R_8Ad_ROI	3.58934	0.0276642	3.73202	1.95905	0.0501436	-2.3703	-2.37986	0.0173443	5.89833e-05	0.000534907
R_9m_ROI	3.32215	0.0361284	3.65945	2.2779	0.0227606	-1.59735	-1.9018	0.0572352	0.000216683	0.000279762
R_8BL_ROI	3.65768	0.0258386	2.38272	1.63319	0.102472	-1.96748	-2.57941	0.00991593	-3.87647e-05	0.000647029
R_9p_ROI	1.28005	0.278084	0.755516	0.727961	0.46666	-0.860917	-1.58662	0.112642	-0.000109413	0.000173419
R_10d_ROI	5.37449	0.00465121	1.05766	1.54846	0.121554	-1.1578	-3.24216	0.00119146	-7.75041e-05	0.000965138
R_8C_ROI	0.463561	0.629058	-0.674794	-0.356723	0.72131	-0.714499	-0.722449	0.470041	-6.93598e-05	-5.57598e-05
R_44_ROI	2.11779	0.12037	0.302264	0.300446	0.763845	-1.06173	-2.01855	0.0435695	-0.000101841	0.000373077
R_45_ROI	3.40904	0.0331243	0.432388	0.514456	0.606949	-1.13544	-2.58396	0.00978611	-0.000102476	0.000676903
R_47l_ROI	6.32814	0.00179492	1.4007	2.59667	0.00943157	-0.892036	-3.16302	0.00156768	0.00017772	0.000969776
R_a47r_ROI	5.63077	0.00360105	3.25915	2.78426	0.00537845	-1.65245	-2.7001	0.00694744	0.000308957	0.000654436
R_6r_ROI	1.40408	0.245658	0.563782	0.348081	0.727789	-1.40641	-1.66084	0.0967867	-0.000109966	0.000203467
R_IFJa_ROI	0.64788	0.523183	-0.442342	-0.728493	0.466335	-0.183799	-0.578972	0.562625	-4.81787e-06	-8.13842e-05
R_IFJp_ROI	0.511609	0.599551	0.00200126	0.00493599	0.996062	-0.202298	-0.954354	0.339935	-0.000103177	-1.03717e-05
R_IFSp_ROI	3.32056	0.0361858	-0.97051	-0.804496	0.421136	-1.2838	-2.03547	0.0418384	0.000182461	0.000383012
R_IFSa_ROI	5.02109	0.00661962	-0.172308	-0.111608	0.911137	-2.37731	-2.94526	0.0032368	4.48051e-05	0.000938086
R_p9_46v_ROI	1.37139	0.253818	-1.1398	-0.604939	0.545238	-1.23008	-1.24872	0.211807	2.20894e-05	6.73717e-05
R_46_ROI	0.877428	0.415894	0.502832	0.198601	0.84258	-1.72124	-1.3003	0.193538	-0.000109939	8.11459e-05
R_a9_46v_ROI	1.9833	0.137687	0.807515	0.838651	0.401692	-0.998379	-1.98323	0.0473787	-0.000113106	0.000343132
R_9_46d_ROI	1.56412	0.20934	1.06709	0.43312	0.66494	-2.26789	-1.76065	0.0783383	-0.000108577	0.000234616
R_9a_ROI	3.02375	0.0486781	0.632422	0.631487	0.527742	-1.28317	-2.45069	0.014281	-0.000104936	0.000547795
R_10v_ROI	2.72311	0.0657356	0.788249	1.76871	0.0769825	-0.472603	-2.02832	0.0425629	3.37731e-05	0.000317103
R_a10p_ROI	1.90711	0.148582	0.829808	1.51837	0.128964	-0.476356	-1.66716	0.0955244	3.61898e-06	0.000186423
R_10pp_ROI	1.99385	0.136242	0.75148	1.34126	0.179877	-0.540201	-1.84415	0.0652009	-4.21294e-05	0.000244647
R_11l_ROI	3.6298	0.0265683	2.60333	2.54972	0.0108008	-0.895303	-1.67717	0.0935502	0.000373804	0.000196657
R_13l_ROI	5.74724	0.0032057	1.22765	2.90891	0.00363766	-0.57761	-2.6178	0.00886778	0.000410215	0.000659534
R_OFC_ROI	7.46013	0.000579877	4.85637	3.04793	0.00231225	-2.71497	-3.25916	0.00112244	0.000348468	0.00101716
R_47s_ROI	6.99117	0.000926001	2.39821	3.04896	0.00230441	-1.25983	-3.06353	0.00219523	0.000409392	0.00095475
R_LIPd_ROI	3.37768	0.0341788	0.723236	1.13055	0.258283	0.610149	1.82427	0.0681509	0.00031166	0.000298974
R_6a_ROI	2.36322	0.094187	3.00072	1.63053	0.103033	-1.83037	-1.90233	0.0571661	1.24385e-05	0.00030385
R_i6_8_ROI	1.28072	0.277899	0.967326	1.26369	0.206382	-0.540154	-1.34968	0.177161	-3.12743e-05	9.8729e-05
R_s6_8_ROI	3.56688	0.0282919	1.62029	1.9286	0.0538182	-1.04911	-2.38845	0.0169443	5.22881e-05	0.000574257
R_43_ROI	2.41964	0.089023	0.690486	0.831203	0.405886	-0.95446	-2.19764	0.0280055	-0.000113522	0.000438825
R_OP4_ROI	4.20581	0.0149441	2.21656	2.27176	0.0231291	-1.2557	-2.46158	0.0138549	0.000148126	0.000554573
R_OP1_ROI	5.53658	0.00395616	0.856845	2.71216	0.00669995	-0.450493	-2.72739	0.00639871	0.000312833	0.000764904
R_OP2_3_ROI	4.52265	0.0108899	0.362589	2.3007	0.0214359	-0.21403	-2.59757	0.00940705	0.000151903	0.000673123
R_52_ROI	1.63659	0.194712	0.165923	1.69129	0.0908229	-0.0601881	-1.17346	0.240647	0.000109064	4.5892e-05
R_RI_ROI	2.02671	0.13184	0.910822	1.93299	0.0532755	-0.290672	-1.1799	0.238078	0.000198856	4.695e-05
R_PFcm_ROI	5.8538	0.00288216	1.52676	2.4206	0.0155186	-1.01935	-3.09117	0.00200106	0.000139	0.00103318
R_PoI2_ROI	5.80744	0.0030187	0.729852	1.16875	0.242543	-1.11266	-3.40797	0.000657938	-0.000108495	0.00115082
R_TA2_ROI	1.43805	0.237457	0.340891	0.761549	0.446353	-0.393896	-1.6831	0.0923974	-0.000114196	0.000218739
R_FOP4_ROI	3.39133	0.0337156	0.40868	0.874524	0.381861	-0.636306	-2.60435	0.00922296	-0.00011623	0.000671689
R_MI_ROI	5.60737	0.00368618	0.333856	0.803726	0.421581	-0.723616	-3.33198	0.00086648	-9.56574e-05	0.00108747
R_Pir_ROI	5.33706	0.00482834	0.448614	1.33996	0.180301	-0.570054	-3.25672	0.00113212	-0.000104552	0.00107619
R_AVI_ROI	7.16123	0.000781436	1.21067	2.24211	0.0249836	-1.02337	-3.62502	0.000290861	2.01877e-05	0.00136127
R_AAIC_ROI	4.09868	0.0166319	0.378819	1.53369	0.125148	-0.360611	-2.79249	0.00524377	-6.71027e-05	0.000758438
R_FOP1_ROI	3.37767	0.034179	0.122028	0.368417	0.712573	-0.441069	-2.54703	0.0108844	-8.36271e-05	0.000626354
R_FOP3_ROI	5.34649	0.00478308	0.309381	1.66912	0.0951353	-0.31101	-3.20934	0.00133604	-6.91013e-05	0.00105693
R_FOP2_ROI	7.16759	0.000776492	0.462166	1.77984	0.0751427	-0.508494	-3.74555	0.000181356	-7.69514e-05	0.0014414
R_PFt_ROI	2.70838	0.0667101	2.29945	1.76327	0.0778965	-1.37951	-2.02333	0.0430749	3.98734e-05	0.000382581
R_AIP_ROI	2.06949	0.126323	3.33847	1.80353	0.0713459	0.271503	0.280541	0.77907	0.000370928	-0.000111679
R_EC_ROI	1.16925	0.310658	0.342611	0.958119	0.338034	-0.27006	-1.44452	0.148633	-9.32729e-05	0.000135465
R_PreS_ROI	2.75567	0.063631	-0.112264	-0.401132	0.688334	-0.299044	-2.04375	0.0410133	4.2664e-05	0.000405855
R_H_ROI	0.462786	0.629546	0.00284767	0.196387	0.844312	-0.00722497	-0.953029	0.340606	-0.000125283	-1.16969e-05
R_ProS_ROI	2.43137	0.0879858	0.181168	0.224451	0.822412	-0.903733	-2.14155	0.0322623	-9.3167e-05	0.000461577
R_PeEc_ROI	2.09438	0.123219	2.21031	1.47387	0.140559	-1.43698	-1.83276	0.0668787	-2.01479e-05	0.000278703
R_STGa_ROI	5.28468	0.00508761	0.125923	0.504868	0.613667	-0.416565	-3.19449	0.00140662	-7.28448e-05	0.00105341
R_PBelt_ROI	1.69237	0.184153	0.567839	1.31318	0.189163	-0.374136	-1.65491	0.097985	-4.17118e-05	0.00020478
R_A5_ROI	1.40407	0.245661	0.749576	0.863811	0.387719	-0.745279	-1.64274	0.100479	-0.000107303	0.000204662
R_PHA1_ROI	1.88185	0.15238	-0.0384232	-0.105283	0.916154	-0.34137	-1.78911	0.0736378	-5.3813e-05	0.000270747
R_PHA3_ROI	2.44902	0.0864479	0.406921	0.960071	0.337051	-0.487673	-2.20074	0.0277852	-0.000110429	0.000448823
R_STSda_ROI	3.94554	0.0193811	0.596062	0.56907	0.569326	-1.52354	-2.78211	0.00541425	-0.000102645	0.000814083
R_STSdp_ROI	1.04556	0.351546	1.19706	1.36964	0.170841	-0.409983	-0.897228	0.369626	3.44809e-05	-2.35002e-05
R_STSvp_ROI	0.729845	0.482018	0.84212	0.918217	0.358535	-0.502574	-1.04814	0.29461	-7.55884e-05	1.16655e-05
R_TGd_ROI	8.47161	0.000211345	2.41059	1.56089	0.118593	-3.32002	-4.11182	3.96751e-05	-0.000106356	0.00175159
R_TE1a_ROI	2.35518	0.0949472	0.653919	0.902368	0.36689	-0.81924	-2.1623	0.0306263	-0.000112053	0.000426543
R_TE1p_ROI	5.02889	0.00656824	3.80018	1.91532	0.0554901	-3.13728	-3.02438	0.00249989	-9.85776e-06	0.000890613
R_TE2a_ROI	1.01425	0.362726	2.16616	1.01206	0.311542	-1.43677	-1.28395	0.199199	-7.101e-05	7.42726e-05
R_TF_ROI	1.7479	0.174211	2.29695	1.14274	0.253183	-1.86829	-1.77782	0.0754748	-7.4211e-05	0.000241104
R_TE2p_ROI	7.21101	0.000743558	0.752544	0.695703	0.486636	-2.12078	-3.75002	0.000178153	-6.54269e-05	0.00133057
R_PHT_ROI	3.83256	0.0216967	1.89953	1.51343	0.130213	-1.76657	-2.69211	0.00711597	-6.46882e-05	0.000693091
R_PH_ROI	7.78142	0.000420808	0.668154	0.474458	0.635187	-2.83314	-3.848	0.000120076	-2.56063e-05	0.00143666
R_TPOJ1_ROI	0.692871	0.50017	0.515788	0.297395	0.766173	-1.06334	-1.17269	0.240958	-0.00011573	4.38878e-05
R_TPOJ2_ROI	0.899991	0.406617	0.912606	0.645194	0.518821	-0.979653	-1.32472	0.185303	-0.00011021	8.71276e-05
R_TPOJ3_ROI	0.822859	0.439214	0.821195	0.760859	0.446765	-0.693218	-1.2285	0.2193	-0.000102875	6.06691e-05
R_DVT_ROI	2.83717	0.0586544	0.767689	0.945003	0.344688	-1.00958	-2.37703	0.0174778	-0.00011502	0.000547793
R_PGp_ROI	1.93206	0.144922	0.478268	0.281292	0.778495	-1.71287	-1.92688	0.0540322	-0.000102097	0.000326236
R_IP2_ROI	2.16077	0.115308	2.72307	1.99324	0.046271	-0.0813234	-0.113858	0.909353	0.000404166	-0.000120585
R_IP1_ROI	1.48775	0.225947	1.66598	1.28976	0.197173	0.435824	0.645351	0.518719	0.000187399	-7.01469e-05
R_IP0_ROI	1.658	0.19059	-0.100238	-0.124562	0.900874	-0.702275	-1.66919	0.0951211	-5.99749e-05	0.000227747
R_PFop_ROI	3.00835	0.049433	1.93927	2.20306	0.0276208	-0.80823	-1.75619	0.0790977	0.000233088	0.000251452
R_PF_ROI	6.26231	0.00191685	5.36761	3.03561	0.00240873	-2.52713	-2.73363	0.00627884	0.000481416	0.000769305
R_PFm_ROI	2.34293	0.0961165	7.35424	2.15047	0.03155	-1.70924	-0.955969	0.339119	0.000328697	-1.02138e-05
R_PGi_ROI	0.219182	0.803181	2.25485	0.660099	0.50921	-0.309888	-0.173517	0.862249	-6.95339e-05	-0.000114009
R_PGs_ROI	0.781271	0.457861	1.9908	1.14516	0.25218	-0.778802	-0.856862	0.391549	-1.98816e-05	-3.07922e-05
R_V6A_ROI	3.09724	0.0452317	0.0899992	0.253748	0.799697	-0.448225	-2.41717	0.0156655	-7.72234e-05	0.000576409
R_VMV1_ROI	0.819931	0.440502	-0.292191	-0.41885	0.675338	-0.364351	-0.998983	0.317835	-4.35317e-05	-2.47259e-07
R_VMV3_ROI	2.375	0.093085	0.436701	1.05368	0.292062	-0.466081	-2.15096	0.0315112	-9.69131e-05	0.000400759
R_PHA2_ROI	1.58287	0.205454	0.0833412	0.306953	0.758887	-0.248955	-1.7538	0.0795064	-0.000110132	0.000251163
R_V4t_ROI	3.52407	0.0295284	-0.0459806	-0.109888	0.912501	-0.538454	-2.46134	0.0138643	-1.202e-06	0.000566032
R_FST_ROI	3.19736	0.0409258	0.545259	0.714578	0.474892	-1.00723	-2.52478	0.0115977	-0.000110005	0.000603063
R_V3CD_ROI	1.69769	0.183176	-0.003029	-0.00459053	0.996337	-0.598167	-1.73393	0.0829714	-7.01814e-05	0.000230355
R_LO3_ROI	2.87001	0.056761	0.0427892	0.0608862	0.951452	-0.83634	-2.27621	0.0228614	-5.12734e-05	0.000485429
R_VMV2_ROI	1.11512	0.327929	0.188983	0.422865	0.672406	-0.348401	-1.49109	0.13598	-0.000112507	0.000138587
R_31pd_ROI	0.920759	0.398262	0.587792	1.06789	0.285606	-0.330228	-1.14753	0.251201	-5.73325e-05	3.82173e-05
R_31a_ROI	1.53527	0.215466	0.736135	1.64047	0.100951	-0.265449	-1.13145	0.257901	9.50865e-05	3.3715e-05
R_VVC_ROI	5.18273	0.00563285	0.58493	0.700035	0.483927	-1.39575	-3.195	0.00140413	-9.42074e-05	0.00102821
R_25_ROI	7.68124	0.000465054	0.841246	2.65264	0.00800338	-0.598413	-3.60913	0.000309234	0.00014693	0.00132369
R_s32_ROI	7.78779	0.000418146	0.675407	2.19191	0.0284166	-0.616641	-3.82769	0.000130409	-8.46486e-06	0.0014922
R_pOFC_ROI	5.65606	0.00351125	1.72134	2.70371	0.00687252	-0.929612	-2.79281	0.00523857	0.000292694	0.000792581
R_PoI1_ROI	1.9668	0.139976	0.289657	0.797049	0.425448	-0.375887	-1.97836	0.0479247	-0.000110387	0.000328034
R_Ig_ROI	6.14435	0.00215643	0.648991	2.61185	0.00902347	-0.400116	-3.07993	0.00207801	0.000208411	0.000981803
R_FOP5_ROI	3.7924	0.0225848	0.973481	1.69291	0.0905134	-0.786138	-2.61488	0.00894368	-2.96206e-05	0.000681919
R_p10p_ROI	2.25849	0.104579	0.916628	0.761471	0.4464	-1.3372	-2.12472	0.0336424	-0.000104601	0.000368425
R_p47r_ROI	4.75403	0.00864294	1.35995	1.648	0.0993948	-1.29796	-3.00844	0.00263466	-6.28334e-05	0.000930463
R_TGv_ROI	0.544841	0.579957	0.40766	0.581406	0.560985	-0.370962	-1.01195	0.311597	-0.000108922	2.8021e-06
R_MBelt_ROI	2.64035	0.0714027	0.435613	1.81693	0.0692672	-0.242638	-1.93572	0.0529393	6.54054e-05	0.000336939
R_LBelt_ROI	3.00893	0.049404	0.662511	1.99697	0.0458643	-0.34916	-2.01303	0.0441472	0.000115842	0.000366393
R_A4_ROI	1.57196	0.207706	0.940895	1.10846	0.267701	-0.743771	-1.67596	0.0937887	-7.60116e-05	0.000206738
R_STSva_ROI	3.03036	0.0483577	0.611295	1.22331	0.221251	-0.633096	-2.42327	0.0154053	-9.67157e-05	0.000580289
R_TE1m_ROI	1.75113	0.173649	1.39741	1.62068	0.105128	-0.642839	-1.42601	0.153908	5.2876e-05	0.000116625
R_PI_ROI	2.05617	0.128015	0.328729	0.863149	0.388083	-0.40189	-2.01837	0.0435879	-0.000109663	0.000350482
R_a32pr_ROI	2.64544	0.0710407	0.787789	1.30912	0.190534	-0.698853	-2.22127	0.0263624	-7.40552e-05	0.00045266
R_p24_ROI	2.65266	0.0705296	0.105131	0.263765	0.791968	-0.467561	-2.24373	0.0248789	-8.88002e-05	0.000491126
L_V1_ROI	3.28985	0.0373133	-2.2943	-0.400027	0.689148	-6.75248	-2.2519	0.0243576	6.33615e-05	0.000507723
L_MST_ROI	0.335024	0.715332	-0.0236963	-0.0327801	0.973851	-0.286978	-0.759318	0.447686	-0.000113469	-5.30121e-05
L_V6_ROI	2.03956	0.130159	-0.235987	-0.291843	0.770415	-0.754271	-1.78416	0.0744378	-1.26479e-05	0.000264497
L_V2_ROI	2.55426	0.0778176	-0.563633	-0.155506	0.876426	-3.9253	-2.07143	0.0383526	-2.09902e-05	0.000378015
L_V3_ROI	1.11723	0.327238	-0.797415	-0.405562	0.685076	-1.25285	-1.21876	0.222973	-2.69456e-05	5.21188e-05
L_V4_ROI	1.00318	0.36676	-2.26231	-0.969147	0.332503	-0.789898	-0.647223	0.517507	6.23364e-05	-6.16613e-05
L_V8_ROI	1.02791	0.357804	-0.445164	-1.20748	0.227286	-0.0621451	-0.322412	0.747149	0.000109906	-0.000103462
L_4_ROI	3.28657	0.0374357	4.75003	2.10309	0.0354915	-2.46543	-2.08785	0.036845	0.000129285	0.000357903
L_3b_ROI	1.16139	0.313106	1.46922	0.875627	0.381261	-1.2888	-1.46914	0.141836	-8.76703e-05	0.000121531
L_FEF_ROI	0.914923	0.400592	0.649768	0.613492	0.53957	-0.742924	-1.34166	0.179748	-0.000118496	9.77167e-05
L_PEF_ROI	0.979875	0.375406	0.706649	1.36287	0.172966	-0.0424827	-0.156714	0.875474	0.0001157	-0.000120679
L_55b_ROI	0.870361	0.418843	0.800765	0.888163	0.374482	-0.573846	-1.21739	0.223495	-8.94361e-05	5.8158e-05
L_V3A_ROI	0.0318983	0.968605	-0.0789725	-0.0765112	0.939014	0.136219	0.252425	0.800719	-0.000117477	-0.000110029
L_RSC_ROI	2.63663	0.0716684	0.217766	0.296519	0.766842	-0.861748	-2.24434	0.0248397	-8.65834e-05	0.000457381
L_POS2_ROI	1.71819	0.179462	-0.370642	-0.269321	0.78769	-1.17776	-1.63689	0.101696	-2.90236e-05	0.000200407
L_V7_ROI	0.0319779	0.968528	-0.00415881	-0.0126998	0.989868	-0.0399972	-0.233617	0.815289	-0.000124221	-0.000118585
L_IPS1_ROI	0.419773	0.657212	-0.273328	-0.312783	0.754454	-0.322559	-0.706016	0.4802	-8.33238e-05	-6.34382e-05
L_FFC_ROI	1.68544	0.185433	-0.660008	-0.572235	0.56718	-0.874829	-1.45076	0.146889	2.92405e-05	0.000121436
L_V3B_ROI	0.0993653	0.905413	-0.0132251	-0.0228627	0.98176	0.129136	0.426994	0.669396	-0.000120253	-9.99928e-05
L_LO1_ROI	1.04586	0.351442	-0.3749	-0.931073	0.351846	-0.153557	-0.729432	0.46576	6.44049e-05	-5.38514e-05
L_LO2_ROI	1.61769	0.198426	-0.581422	-1.25959	0.207858	-0.189703	-0.786062	0.431856	0.000176782	-4.17665e-05
L_PIT_ROI	1.55177	0.211941	-0.68631	-1.48712	0.137025	-0.0940381	-0.389741	0.696739	0.000218539	-9.49755e-05
L_MT_ROI	0.380302	0.683668	-0.156607	-0.287319	0.773876	-0.19349	-0.678983	0.49717	-8.66641e-05	-6.67055e-05
L_A1_ROI	0.366687	0.693039	0.122999	0.404958	0.68552	-0.134467	-0.846782	0.397144	-0.000120501	-3.46693e-05
L_PSL_ROI	4.59811	0.0100994	1.04817	0.839427	0.401256	-1.97589	-3.02665	0.00248125	-0.000112429	0.000950422
L_SFL_ROI	3.24661	0.0389608	2.3952	2.08152	0.03742	-1.2537	-2.08391	0.0372022	0.000136431	0.000396586
L_PCV_ROI	3.15384	0.0427448	2.99767	2.50883	0.0121341	-0.594923	-0.952344	0.340953	0.000532085	-1.12509e-05
L_STV_ROI	6.27197	0.00189846	1.59421	1.79894	0.0720681	-1.61142	-3.47799	0.000508073	-6.56485e-05	0.00131524
L_7Pm_ROI	1.21604	0.296459	0.863451	1.53443	0.124966	-0.0745236	-0.253309	0.800037	0.000170279	-0.000116498
L_7m_ROI	0.304822	0.737264	0.403134	0.508846	0.610875	-0.301865	-0.72878	0.466159	-0.000110411	-5.61924e-05
L_POS1_ROI	5.58351	0.00377505	1.06473	0.997274	0.318664	-1.86382	-3.33908	0.000844688	-0.00011372	0.0011734
L_23d_ROI	1.68902	0.184772	0.36126	0.922534	0.35628	-0.37	-1.80722	0.0707679	-0.000105439	0.000269005
L_v23ab_ROI	3.68366	0.0251766	-0.144025	-0.372698	0.709384	-0.486296	-2.40694	0.0161111	6.61452e-05	0.00055308
L_d23ab_ROI	1.13585	0.321205	0.0440987	0.09382	0.925255	-0.355918	-1.44833	0.147568	-9.57291e-05	0.000127213
L_31pv_ROI	1.89364	0.150595	0.0992193	0.150595	0.8803	-0.646903	-1.87801	0.0604181	-8.76296e-05	0.000299277
L_5m_ROI	2.59814	0.0744793	0.742466	1.98603	0.0470666	-0.336432	-1.72128	0.0852406	0.000152834	0.000243292
L_5mv_ROI	2.8202	0.0596572	1.38288	2.24939	0.0245166	-0.473658	-1.47365	0.140619	0.000303732	0.000144173
L_23c_ROI	4.51677	0.0109541	2.0782	2.4275	0.0152268	-1.11225	-2.48497	0.0129781	0.000217334	0.000605488
L_5L_ROI	1.42367	0.240894	0.989795	1.4784	0.139342	-0.442079	-1.26297	0.206639	3.02581e-05	7.14173e-05
L_24dd_ROI	6.08174	0.00229552	2.34876	2.76118	0.00577333	-1.30512	-2.93462	0.00334978	0.000307529	0.000917946
L_24dv_ROI	6.73185	0.00119957	1.58131	3.05081	0.00229027	-0.798183	-2.94541	0.00323519	0.000460673	0.000933758
L_7AL_ROI	2.43104	0.0880149	2.69387	2.08943	0.0367026	-0.920605	-1.36575	0.172058	0.000243337	0.000105465
L_SCEF_ROI	7.15009	0.000790176	3.10035	2.746	0.00604719	-1.99021	-3.37157	0.00075119	0.000226845	0.00121792
L_6ma_ROI	3.1445	0.0431456	2.98318	2.20305	0.0276215	-1.32307	-1.86885	0.0616829	0.000219848	0.000305148
L_7Am_ROI	2.3476	0.095669	2.82127	2.16364	0.0305239	-0.571355	-0.838093	0.402005	0.000363376	-3.61379e-05
L_7PL_ROI	1.39489	0.247925	0.757673	1.3552	0.175395	-0.401913	-1.37499	0.169176	-1.26233e-05	0.000111398
L_7PC_ROI	1.74898	0.174022	2.09319	1.63893	0.101269	-0.934443	-1.39943	0.161725	6.67238e-05	0.000118565
L_LIPv_ROI	4.0047	0.0182689	2.57994	2.53755	0.0111833	-1.08066	-2.03301	0.0420864	0.000362662	0.000395164
L_VIP_ROI	3.33736	0.0355835	2.02571	2.30935	0.0209512	-0.856233	-1.86703	0.0619368	0.000269813	0.000306492
L_MIP_ROI	1.03258	0.356138	1.08932	1.07648	0.281749	-0.665787	-1.25843	0.208276	-6.6007e-05	7.43007e-05
L_1_ROI	1.1928	0.303429	0.155793	0.0982136	0.921765	-1.23137	-1.48476	0.137649	-8.98678e-05	0.000132175
L_2_ROI	1.89311	0.150674	0.178688	0.0672302	0.9464	-2.57649	-1.85415	0.0637577	-7.53774e-05	0.000281898
L_3a_ROI	0.789295	0.454203	0.825272	1.07183	0.283831	-0.393559	-0.977653	0.328278	-3.99747e-05	-4.68423e-06
L_6d_ROI	3.91424	0.0199967	1.4522	1.67093	0.0947783	-1.21558	-2.67523	0.00748399	-3.82769e-05	0.000715924
L_6mp_ROI	6.14845	0.00214763	3.00043	2.28418	0.0223891	-2.2482	-3.27361	0.00106664	6.93056e-05	0.00116313
L_6v_ROI	0.563142	0.569441	0.51004	1.05467	0.291609	-0.11774	-0.465677	0.64146	-1.0701e-05	-9.26476e-05
L_p24pr_ROI	0.911339	0.40203	0.323962	0.914137	0.360674	-0.230294	-1.24293	0.213934	-8.97524e-05	6.77174e-05
L_33pr_ROI	1.93219	0.144904	0.413479	1.56612	0.117362	-0.227112	-1.64535	0.09994	1.9676e-05	0.000214017
L_a24pr_ROI	4.14507	0.0158787	1.01678	2.30592	0.0211422	-0.553026	-2.39888	0.0164699	0.000190896	0.00059141
L_p32pr_ROI	7.48157	0.000567604	1.71069	2.66383	0.00774225	-1.18754	-3.53695	0.000407236	0.000171842	0.00136274
L_a24_ROI	4.11074	0.0164327	0.923495	1.70262	0.0886815	-0.778445	-2.74509	0.00606391	-3.55765e-05	0.000738457
L_d32_ROI	4.6243	0.00983858	1.82862	2.64957	0.00807647	-0.828614	-2.29641	0.0216801	0.000336135	0.000482986
L_8BM_ROI	4.38632	0.0124785	2.16988	2.30233	0.0213437	-1.24599	-2.52868	0.0114696	0.000156133	0.000611406
L_p32_ROI	3.29338	0.037182	0.905187	1.95011	0.0512002	-0.540402	-2.22682	0.0259892	6.60542e-05	0.000416762
L_10r_ROI	1.02394	0.359227	0.532937	1.11947	0.262977	-0.302612	-1.21582	0.224092	-4.94663e-05	5.49694e-05
L_47m_ROI	7.90641	0.000371464	0.951871	3.47758	0.000508838	-0.427181	-2.98509	0.00284413	0.000632283	0.000847739
L_8Av_ROI	0.217829	0.804268	1.20805	0.644294	0.519405	-0.344598	-0.351526	0.725203	-8.18615e-05	-0.000104327
L_8Ad_ROI	1.66178	0.189871	0.494023	0.229507	0.818481	-2.00376	-1.7805	0.0750355	-0.000101007	0.000258864
L_9m_ROI	7.55407	0.000527983	4.19789	3.28344	0.0010302	-2.04718	-3.06267	0.00220151	0.000489293	0.000867516
L_8BL_ROI	2.28555	0.101789	0.914735	1.06481	0.286995	-0.944983	-2.10401	0.0354109	-0.000102318	0.000409568
L_9p_ROI	3.71407	0.0244232	2.34953	2.12865	0.0333156	-1.33791	-2.31844	0.0204525	0.000123609	0.000513946
L_10d_ROI	3.60488	0.027238	1.9653	1.9485	0.0513926	-1.26287	-2.39485	0.0166518	4.9005e-05	0.000489791
L_8C_ROI	0.0487965	0.952375	0.421315	0.211927	0.83217	-0.298713	-0.287395	0.773818	-0.000116158	-0.000108215
L_44_ROI	0.788584	0.454526	0.840938	0.918493	0.35839	-0.533884	-1.11533	0.264743	-8.17429e-05	2.99107e-05
L_45_ROI	1.51119	0.220716	1.44892	1.06245	0.288066	-1.17866	-1.65309	0.0983535	-8.56835e-05	0.000208963
L_47l_ROI	4.53728	0.010732	1.39304	2.46078	0.0138858	-0.729114	-2.4635	0.0137811	0.000216655	0.000547785
L_a47r_ROI	5.41883	0.00444978	2.93294	2.83535	0.0045899	-1.36743	-2.52845	0.0114772	0.000362583	0.000567874
L_6r_ROI	0.900602	0.406369	0.462058	0.348222	0.727684	-0.928058	-1.33777	0.181013	-0.000116064	9.27226e-05
L_IFJa_ROI	0.517816	0.595842	-0.310314	-0.461278	0.644613	-0.245965	-0.699328	0.484369	-5.4736e-05	-6.16964e-05
L_IFJp_ROI	0.199726	0.818959	0.295039	0.504406	0.613991	-0.161527	-0.528192	0.597382	-0.0001027	-8.42107e-05
L_IFSp_ROI	0.611842	0.542378	-0.922449	-1.00414	0.315345	-0.0478587	-0.0996455	0.920628	2.66268e-05	-0.00012327
L_IFSa_ROI	0.814521	0.442891	-1.45014	-0.893494	0.371622	-0.473602	-0.558139	0.576766	3.86899e-05	-8.38776e-05
L_p9_46v_ROI	1.31335	0.268979	-2.02246	-1.59616	0.110496	0.530717	0.801136	0.423078	0.000115643	-4.20603e-05
L_46_ROI	0.549463	0.577283	-2.13075	-0.910923	0.362365	-0.223159	-0.182478	0.855213	7.6417e-06	-0.000112356
L_a9_46v_ROI	0.636393	0.529227	0.849694	0.726961	0.467272	-0.645842	-1.05687	0.290606	-9.45207e-05	1.30983e-05
L_9_46d_ROI	0.927101	0.395745	2.39692	0.957438	0.338377	-1.61476	-1.23371	0.217351	-7.36417e-05	5.75661e-05
L_9a_ROI	2.83981	0.0584999	2.94417	2.04706	0.0406866	-1.38154	-1.83729	0.0662063	0.000149211	0.000271943
L_10v_ROI	2.14723	0.116879	0.867469	1.6005	0.10953	-0.503745	-1.7777	0.0754932	1.45313e-05	0.000234384
L_a10p_ROI	3.87644	0.0207661	1.68084	2.46976	0.0135426	-0.726221	-2.041	0.041286	0.000274643	0.000336149
L_10pp_ROI	4.6203	0.00987804	1.21262	2.75576	0.00586982	-0.491089	-2.13463	0.032824	0.000395192	0.000381633
L_11l_ROI	6.3032	0.00184018	2.92391	3.36877	0.000758875	-0.993081	-2.18845	0.0286675	0.000727686	0.000404574
L_13l_ROI	8.06129	0.000318271	2.86699	3.76206	0.000169808	-1.03038	-2.58609	0.00972592	0.000926215	0.000624723
L_OFC_ROI	5.64626	0.00354577	4.7909	2.99261	0.00277509	-2.04685	-2.44549	0.0144884	0.00051381	0.000593616
L_47s_ROI	8.4584	0.000214148	2.19537	3.42444	0.000619369	-1.10491	-3.29651	0.000983493	0.000551604	0.00107823
L_LIPd_ROI	3.25153	0.0387697	1.89506	2.51556	0.011905	-0.488154	-1.23941	0.215232	0.000511892	6.91947e-05
L_6a_ROI	4.33059	0.0131928	4.16889	2.08187	0.0373886	-2.78362	-2.65882	0.0078582	6.92544e-05	0.000711251
L_i6_8_ROI	0.897167	0.407767	0.736604	1.086	0.277512	-0.391331	-1.10354	0.269828	-5.08242e-05	2.61421e-05
L_s6_8_ROI	1.34157	0.261497	0.212828	0.448227	0.654002	-0.405764	-1.63451	0.102194	-0.000122591	0.000207295
L_43_ROI	0.391388	0.676132	0.0669135	0.126173	0.899599	-0.24044	-0.867172	0.385876	-0.000110968	-2.84005e-05
L_OP4_ROI	0.465302	0.627963	0.557915	0.706686	0.479784	-0.353305	-0.855963	0.392046	-8.76427e-05	-2.92163e-05
L_OP1_ROI	0.833064	0.434756	0.646062	1.01053	0.312274	-0.366342	-1.09599	0.273117	-6.11142e-05	2.29825e-05
L_OP2_3_ROI	4.94554	0.00713835	0.85108	2.46682	0.013654	-0.480967	-2.66643	0.0076827	0.000203638	0.000698911
L_52_ROI	2.25993	0.10443	0.320029	1.848	0.0646419	-0.14586	-1.611	0.107222	0.000111399	0.000192296
L_RI_ROI	1.54386	0.213623	0.953623	1.58606	0.112768	-0.391501	-1.24544	0.21301	6.17276e-05	6.34129e-05
L_PFcm_ROI	1.71753	0.17958	1.32805	1.57873	0.114441	-0.635522	-1.44501	0.148497	3.96067e-05	0.00012426
L_PoI2_ROI	4.99041	0.00682554	0.637643	1.04484	0.296132	-1.008	-3.15919	0.00158837	-0.000106917	0.000959455
L_TA2_ROI	5.75889	0.00316863	0.65954	2.04367	0.0410212	-0.546455	-3.23869	0.00120603	3.13951e-06	0.00108873
L_FOP4_ROI	3.96003	0.0191025	1.43403	2.0348	0.041906	-0.926641	-2.5149	0.0119275	6.83272e-05	0.000611915
L_MI_ROI	4.12677	0.0161717	0.469074	1.0267	0.304593	-0.686053	-2.87216	0.00408829	-0.000105278	0.00076581
L_Pir_ROI	6.39022	0.00168706	0.398371	1.42494	0.154216	-0.521357	-3.5669	0.000363491	-0.000102917	0.00127836
L_AVI_ROI	4.31203	0.0134397	0.944498	2.15986	0.0308152	-0.594406	-2.59988	0.0093439	9.68756e-05	0.00064593
L_AAIC_ROI	5.56022	0.00386386	0.515062	2.2499	0.0244842	-0.367962	-3.07435	0.00211723	7.25874e-05	0.000918936
L_FOP1_ROI	1.31731	0.267917	0.22983	1.06191	0.288313	-0.171211	-1.51307	0.130305	-7.5229e-05	0.000148125
L_FOP3_ROI	6.79462	0.00112671	0.384953	1.67913	0.0931691	-0.438111	-3.65517	0.000258779	-8.55436e-05	0.00136866
L_FOP2_ROI	4.82794	0.00802795	0.742184	2.38396	0.0171524	-0.435956	-2.6784	0.00741359	0.000162796	0.000678642
L_PFt_ROI	1.25525	0.285065	0.979008	0.691043	0.48956	-1.16668	-1.57513	0.115269	-0.000114947	0.000175397
L_AIP_ROI	1.05654	0.347708	2.54916	1.26461	0.206051	-1.15943	-1.10014	0.271306	-1.18754e-05	2.5683e-05
L_EC_ROI	0.627145	0.534142	0.290781	0.483504	0.628752	-0.350253	-1.11394	0.265341	-0.000125501	3.0643e-05
L_PreS_ROI	3.88973	0.0204923	0.0193169	0.060714	0.951589	-0.440261	-2.64672	0.00814471	-2.80546e-05	0.000744017
L_H_ROI	0.625975	0.534768	0.0060065	0.273456	0.78451	-0.0127904	-1.11377	0.265414	-0.000126592	3.07996e-05
L_ProS_ROI	4.29378	0.0136869	0.565501	0.616784	0.537396	-1.39274	-2.90546	0.00367785	-0.000108669	0.000945774
L_PeEc_ROI	2.27468	0.102901	2.54726	1.34679	0.178088	-1.98793	-2.01036	0.0444288	-6.05798e-05	0.000374102
L_STGa_ROI	9.02851	0.000121254	0.544094	2.04559	0.0408317	-0.583425	-4.19542	2.75513e-05	-5.89026e-05	0.00178868
L_PBelt_ROI	0.578443	0.560796	-0.190058	-0.224556	0.822331	-0.404992	-0.915234	0.360098	-8.01759e-05	-1.91232e-05
L_A5_ROI	0.645465	0.524448	0.479443	0.687102	0.49204	-0.395155	-1.08317	0.278767	-0.000105863	2.07904e-05
L_PHA1_ROI	2.62768	0.0723123	0.324189	0.807172	0.419593	-0.481309	-2.29213	0.0219261	-0.000121741	0.000518433
L_PHA3_ROI	0.652458	0.520794	0.59505	0.991532	0.321458	-0.272186	-0.867492	0.3857	-5.27232e-05	-2.91527e-05
L_STSda_ROI	2.4616	0.0853675	0.630213	0.83301	0.404866	-0.876858	-2.21686	0.0266625	-0.000117291	0.000462991
L_STSdp_ROI	1.39277	0.248452	1.75223	1.6664	0.0956764	-0.35605	-0.647657	0.517227	0.000166318	-7.06856e-05
L_STSvp_ROI	1.61637	0.198689	1.59535	1.34002	0.18028	-0.983087	-1.5794	0.114286	-3.11738e-05	0.000177859
L_TGd_ROI	6.66902	0.00127721	1.44576	0.839419	0.401261	-3.26848	-3.62972	0.000285623	-8.57137e-05	0.00124476
L_TE1a_ROI	1.19233	0.30357	0.369706	0.387114	0.698683	-0.767979	-1.53808	0.124073	-0.000108386	0.000150878
L_TE1p_ROI	5.17766	0.00566144	3.09772	1.46705	0.142406	-3.52224	-3.19055	0.00142588	-9.66442e-05	0.00107479
L_TE2a_ROI	2.00143	0.135215	1.91338	0.864051	0.387588	-2.30386	-1.98994	0.0466339	-0.000106544	0.00032943
L_TF_ROI	3.64487	0.0261712	2.77497	1.49584	0.134738	-2.54083	-2.61969	0.00881878	-6.18289e-05	0.000631809
L_TE2p_ROI	4.72951	0.00885728	0.856247	0.912185	0.361701	-1.50805	-3.07289	0.00212762	-0.000104994	0.000900275
L_PHT_ROI	3.55773	0.0285518	2.09567	1.31895	0.187226	-2.18226	-2.62699	0.008632	-9.46725e-05	0.000710505
L_PH_ROI	2.69144	0.0678492	0.412466	0.231619	0.81684	-2.09677	-2.25208	0.0243462	-7.587e-05	0.000448092
L_TPOJ1_ROI	4.19724	0.0150725	2.78115	2.73421	0.00626781	-0.968714	-1.82158	0.0685582	0.000492167	0.00027995
L_TPOJ2_ROI	0.428918	0.651229	1.15772	0.922867	0.356106	-0.154966	-0.236276	0.813225	-2.44542e-05	-0.000116707
L_TPOJ3_ROI	0.6574	0.518227	0.847869	1.08502	0.277947	-0.291673	-0.713926	0.475295	-2.41729e-05	-6.08435e-05
L_DVT_ROI	3.57073	0.0281832	0.111908	0.147677	0.882602	-1.01531	-2.5627	0.0104056	-5.18367e-05	0.000676423
L_PGp_ROI	1.3578	0.25729	1.62069	1.35096	0.176749	-0.842212	-1.3428	0.179378	-1.06732e-05	9.78396e-05
L_IP2_ROI	4.27235	0.0139831	3.50528	2.75053	0.00596428	-1.23691	-1.85642	0.0634332	0.000513236	0.00030641
L_IP1_ROI	1.38583	0.250181	1.91772	1.54592	0.122167	0.0404765	0.0624095	0.950238	0.000226253	-0.000127497
L_IP0_ROI	0.0703801	0.93204	0.157803	0.197195	0.84368	0.0980438	0.23434	0.814727	-0.000116668	-0.000120649
L_PFop_ROI	3.04363	0.0477205	1.29676	1.28604	0.198469	-1.2733	-2.41529	0.0157464	-8.50951e-05	0.000550686
L_PF_ROI	4.14687	0.0158502	5.99499	2.01681	0.043751	-4.06241	-2.614	0.00896675	5.31095e-05	0.000673611
L_PFm_ROI	2.72644	0.0655172	7.85351	1.98495	0.0471866	-3.77622	-1.82553	0.067961	0.000138941	0.000289402
L_PGi_ROI	1.96279	0.140539	3.73577	1.44772	0.147738	-2.37515	-1.76052	0.07836	-2.03965e-05	0.000245917
L_PGs_ROI	1.45456	0.233569	3.27712	1.56701	0.117154	-1.26936	-1.16095	0.2457	6.8498e-05	4.24514e-05
L_V6A_ROI	1.29175	0.27485	-0.0486134	-0.141921	0.887146	-0.261508	-1.46023	0.144269	-6.76824e-05	0.000139629
L_VMV1_ROI	4.46345	0.0115533	0.730989	1.09908	0.271767	-1.03833	-2.98607	0.00283505	-0.000119904	0.000958205
L_VMV3_ROI	0.0597213	0.942027	-0.123492	-0.337669	0.735622	0.00843754	0.0441278	0.964804	-0.000100389	-0.000113566
L_PHA2_ROI	0.97068	0.378873	0.370437	1.33405	0.182229	-0.120068	-0.827045	0.408238	3.15758e-05	-3.87693e-05
L_V4t_ROI	0.819604	0.440646	-0.308373	-0.841753	0.399953	-0.119843	-0.625702	0.531529	2.81924e-05	-6.92426e-05
L_FST_ROI	0.93877	0.391155	0.0867655	0.10099	0.919561	-0.593351	-1.32096	0.186554	-0.000103186	8.86197e-05
L_V3CD_ROI	0.544427	0.580197	0.411879	0.637009	0.524138	-0.33551	-0.992493	0.320989	-0.00010515	-1.75519e-06
L_LO3_ROI	0.365487	0.693871	-0.106736	-0.18752	0.851258	-0.215041	-0.722614	0.46994	-9.45572e-05	-5.71185e-05
L_VMV2_ROI	1.01037	0.364134	0.282691	1.09923	0.271705	-0.163814	-1.21835	0.223129	-5.2321e-05	5.46614e-05
L_31pd_ROI	0.881835	0.414066	0.586387	0.796845	0.425566	-0.488005	-1.26841	0.20469	-0.000101584	7.31822e-05
L_31a_ROI	1.05212	0.349247	0.54299	1.37735	0.168446	-0.183763	-0.89157	0.372652	3.68739e-05	-2.44488e-05
L_VVC_ROI	0.500815	0.606057	-0.407009	-0.458864	0.646345	-0.316955	-0.683477	0.494326	-5.36668e-05	-6.14486e-05
L_25_ROI	3.35569	0.0349378	0.338978	1.02084	0.307363	-0.448879	-2.58561	0.00973945	-0.000107601	0.000627678
L_s32_ROI	2.45811	0.085666	0.244944	0.891381	0.372754	-0.317745	-2.21167	0.0270195	-0.000107078	0.000427084
L_pOFC_ROI	6.31429	0.00181992	1.36244	3.11429	0.00185086	-0.608116	-2.65874	0.00786008	0.000540943	0.000720213
L_PoI1_ROI	6.23803	0.00196388	0.722805	1.71332	0.0866953	-0.768654	-3.48493	0.000495086	-7.57593e-05	0.00126002
L_Ig_ROI	6.76686	0.00115838	0.521298	2.98654	0.0028307	-0.276225	-3.02685	0.00247959	0.000387162	0.000937572
L_FOP5_ROI	3.36763	0.0345236	1.01474	2.02756	0.0426406	-0.57752	-2.20714	0.0273343	0.000101188	0.000453866
L_p10p_ROI	2.46956	0.0846908	1.69809	1.84973	0.0643919	-0.855248	-1.78191	0.0748039	8.24837e-05	0.000234991
L_p47r_ROI	1.15554	0.314944	0.0782208	0.0732919	0.941576	-0.811733	-1.45477	0.145776	-9.37926e-05	0.000130018
L_TGv_ROI	2.03223	0.131116	0.282291	0.54045	0.588903	-0.549149	-2.01092	0.0443697	-0.000107563	0.000334211
L_MBelt_ROI	0.810789	0.444546	0.323289	0.85942	0.390137	-0.230861	-1.17384	0.240496	-9.37901e-05	4.68662e-05
L_LBelt_ROI	0.402735	0.668504	0.0729546	0.217854	0.827549	-0.156385	-0.893212	0.371772	-0.000118824	-2.42117e-05
L_A4_ROI	0.858623	0.423787	0.755665	0.7194	0.471917	-0.69931	-1.27338	0.202924	-0.000104013	7.14916e-05
L_STSva_ROI	1.60691	0.200576	0.659658	0.779607	0.435647	-0.788515	-1.78243	0.0747196	-0.000110715	0.000250189
L_TE1m_ROI	1.80897	0.163895	1.07384	1.22968	0.218857	-0.81269	-1.78001	0.0751154	-6.34433e-05	0.000249812
L_PI_ROI	7.30493	0.000677025	0.667141	1.50429	0.13255	-0.884576	-3.815	0.000137281	-0.000103537	0.00148339
L_a32pr_ROI	5.11844	0.00600633	1.76424	2.7122	0.00669922	-0.85365	-2.51009	0.0120909	0.00033351	0.00060227
L_p24_ROI	5.0604	0.00636478	0.897875	2.28798	0.0221662	-0.584898	-2.85078	0.00437318	0.000118731	0.00085235
