# Supplementary material for: Brain and molecular mechanisms underlying the nonlinear association between close friendships, mental health, and cognition in children
Source: eLife. 2023 Jul 3;12:e84072. doi: 10.7554/eLife.84072 (PMC10317501; doi:10.7554/eLife.84072)
Supplement: Supplementary file 1. [file elife-84072-supp1.xlsx]

## Sheet: Sheet1
Detailed information of neurotransmitter density data.
Receptor/Transporter (*)	Neurotransmitter	Modality	Tracer	File name	N healthy volunteers	Males	Age	References
5-HT1a	serotonin	PET	(11C)WAY-100635	5HT1a_WAY_HC36.nii	35	0.51	26.3 ± 5.2	Savli, M. et al. Normative database of the serotonergic system in healthy subjects using multi-tracer PET. NeuroImage 63, 447–459 (2012).
5-HT1b	serotonin	PET	[11C]AZ10419369	5HT1b_az_hc36_beliveau.nii	36	0.67	27.8±6.9	Beliveau, V. et al. A High-Resolution In Vivo Atlas of the Human Brain’s Serotonin System. J. Neurosci. 37, 120–128 (2017).
5-HT2a	serotonin	PET	[11C]Cimbi-36	5HT2a_cimbi_hc29_beliveau.nii	29	0.52	22.6±2.7	Beliveau, V. et al. A High-Resolution In Vivo Atlas of the Human Brain’s Serotonin System. J. Neurosci. 37, 120–128 (2017).
5-HT4	serotonin	PET	[11C]SB207145	5HT4_sb20_hc59_beliveau.nii	59	0.7	25.9±5.3	Beliveau, V. et al. A High-Resolution In Vivo Atlas of the Human Brain’s Serotonin System. J. Neurosci. 37, 120–128 (2017).
5-HTT*	serotonin	PET	[11C]DASB	SERT_dasb_hc100_beliveau.nii	100	0.29	25.1±5.8	Beliveau, V. et al. A High-Resolution In Vivo Atlas of the Human Brain’s Serotonin System. J. Neurosci. 37, 120–128 (2017).
D1	dopamine	PET	(11C)SCH23390	D1_SCH23390_c11.nii	13	0.46	33 ± 13 yrs	Kaller, S. et al. Test–retest measurements of dopamine D1-type receptors using simultaneous PET/MRI imaging. Eur. J. Nucl. Med. Mol. Imaging 44, 1025–1032 (2017).
D2	dopamine	PET	(11C)Raclopride	D2_RACLOPRIDE_c11.nii	7	1	24 ± 2	Alakurtti, K. et al. Long-Term Test–Retest Reliability of Striatal and Extrastriatal Dopamine D2/3 Receptor Binding: Study with [11C]Raclopride and High-Resolution PET. J. Cereb. Blood Flow Metab. 35, 1199–1205 (2015).
DAT*	dopamine	SPECT	(123I)-FP-CIT	DAT_DATSPECT.nii	174	0.63	61±11	Dukart, J. et al. Cerebral blood flow predicts differential neurotransmitter activity. Sci. Rep. 8, 4074 (2018).
CB1	cannabinoid	PET	[11C]OMAR	CB1_FMPEPd2_hc22_laurikainen.nii	77	0.64	30±8.9	Hansen, J. Y. et al. Mapping neurotransmitter systems to the structural and functional organization of the human neocortex. Nat. Neurosci. 25, 1569–1581 (2022).
GABAa	GABA	PET	(11C)flumazenil	GABAa_flumazenil_hc16_norgaard.nii	16	0.44	26.6 ± 8	Nørgaard, M. et al. A high-resolution in vivo atlas of the human brain’s benzodiazepine binding site of GABAA receptors. NeuroImage 232, 117878 (2021).
mGluR5	glutemate	PET	[11C]ABP688	mGluR5_abp_hc73_smart.nii	74	0.34	20 ± 3.0	Smart, K. et al. Sex differences in [11C]ABP688 binding: a positron emission tomography study of mGlu5 receptors. Eur. J. Nucl. Med. Mol. Imaging 46, 1179–1183 (2019).
NAT	norepinephrine	PET	S,S-(11C)O-methylreboxetine (MRB)	NAT_MRB_c11.nii	10	0.6	33.3±10	Hesse, S. et al. Central noradrenaline transporter availability in highly obese, non-depressed individuals. Eur. J. Nucl. Med. Mol. Imaging 44, 1056–1064 (2017).
μ-opioid (MOR)	opioid	PET	[11C]carfentanil	MU_CARFENTANIL_c11.nii	204	0.65	male: 27.8±8female: 40.7±10.3	Kantonen, T. et al. Interindividual variability and lateralization of μ-opioid receptors in the human brain. NeuroImage 217, 116922 (2020).
VAChT*	acetylcholine	PET	[18F]FEOBV	VAChT_feobv_hc18_aghourian.nii	6	0.5	67±11.1	Aghourian, M. et al. Quantification of brain cholinergic denervation in Alzheimer’s disease using PET imaging with [18F]-FEOBV. Mol. Psychiatry 22, 1531–1538 (2017).
